# Supplementary material
Source: Springer Nature journal article supplement (https://www.springermedizin.de/resource/supplementary/12916_2013_888_MOESM25_ESM.pdf/9598866)
Supplement: MOESM25 [file 9598866]

| Neonatal Causes         | Tariff |        | SSP    |        | RF     |        | PCVA   |        | InterVA |        |
|-------------------------|--------|--------|--------|--------|--------|--------|--------|--------|---------|--------|
|                         | No HCE | HCE    | No HCE  | HCE    |
|                         | Median  | Median |
| Birth asphyxia          | 37.9   | 40.5   | 52.7   | 56.5   | 58.4   | 58.4   | 57.2   | 57     | 49.5    | 49.9   |
| Congenital malformation | 45.2   | 47.5   | 37.8   | 38.9   | 54.2   | 54.8   | 23.6   | 40.9   | 1.6     | 1.6    |
| Meningitis/Sepsis       | 57.1   | 61.9   | 64.2   | 67.7   | 52.4   | 54.8   | 21.6   | 32.1   | 27.4    | 27.4   |
| Pneumonia               | 40.6   | 42.9   | 23.2   | 28.4   | 9.5    | 19     | 20.6   | 13     | 38.2    | 37.1   |
| Preterm Delivery        | 58.3   | 59.2   | 72.5   | 68.8   | 71.2   | 72.3   | 56.3   | 54.5   | 12.8    | 14.8   |
| Stillbirth              | 84.5   | 86     | 92.1   | 92.1   | 90.8   | 90.6   | 79.3   | 81.1   | 90.7    | 86.3   |
